# Supplementary material for: Apoptotic and proliferative processes in the small intestine of rats with type 2 diabetes mellitus after metformin and propionic acid treatment
Source: Frontiers journal article supplement (doi:10.3389/fphar.2024.1477793), 2024-10-16

**Supplementary Information file 1**  
**Initial set of Western blot experiments**  
**(full-length, original, unprocessed versions of blots)**

**Raw data from Western blot experiments using Bax antibody**  
**(Fig. 3 in the manuscript)**

Immunoblotting was conducted with primary antibody against Bax (1:500, #MA5-14003, Invitrogen, USA), 10 % PAAG, 50 µg of protein per track. Samples are labelled (according to the Table 1) above the images.

**Table 1 Sample labelling**

| Gel 1 (Bax)            | Gel 2 (Bax)            |
|------------------------|------------------------|
| 1 – marker;            | 1 – marker;            |
| 2 – Control (31);      | 2 – Control (33);      |
| 3 – DM2 (52);          | 3 – DM2 (54);          |
| 4 – DM2 + met. (41);   | 4 – DM2 + met. (45);   |
| 5 – DM2 + prop. (62);  | 5 – DM2 + prop. (62);  |
| 6 – DM2 + comb. (71);  | 6 – DM2 + comb. (74);  |
| 7 – Control (32);      | 7 – Control (33);      |
| 8 – DM2 (53);          | 8 – DM2 (52);          |
| 9 – DM2 + met. (43);   | 9 – DM2 + prop. (62);  |
| 10 – DM2 + prop. (62). | 10 – DM2 + comb. (75). |

**Notes:**

marker – protein ladder;

Control – the control group;

DM2 – the group with experimentally induced type 2 diabetes mellitus (T2DM);

DM2 + met. – the T2DM group that received anti-hyperglycemic agent metformin;

DM2 + prop. – the T2DM group that received sodium salt of propionic acid (PA);

DM2 + comb. – the T2DM group that received concurrently metformin and PA.

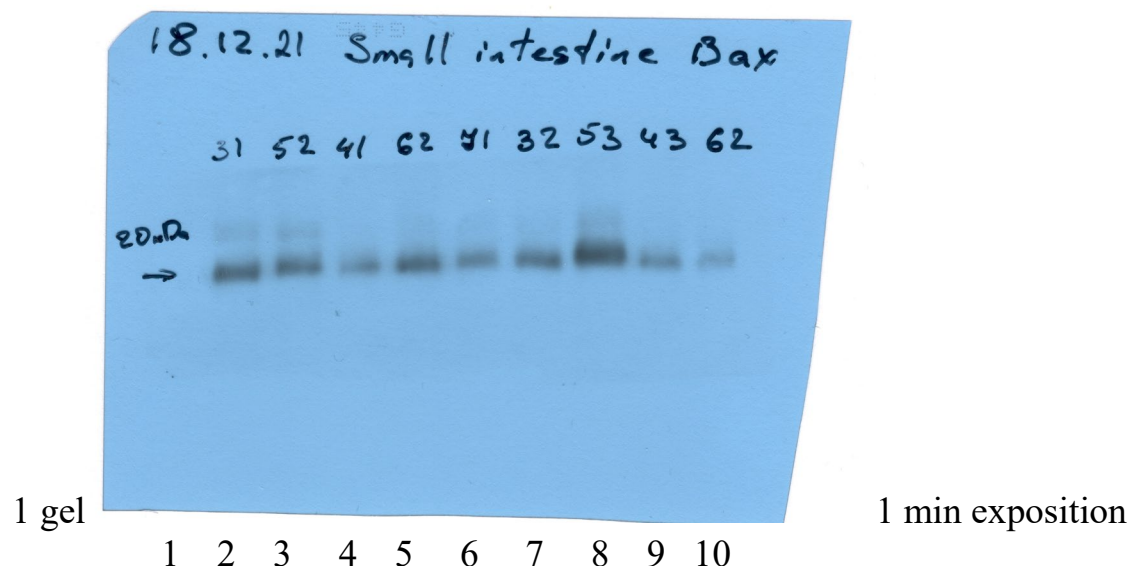

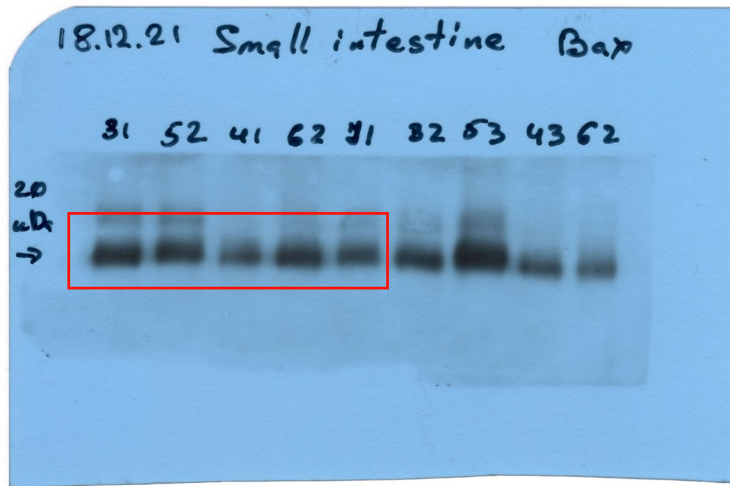

1 gel

3 min exposition

1 2 3 4 5 6 7 8 9 10

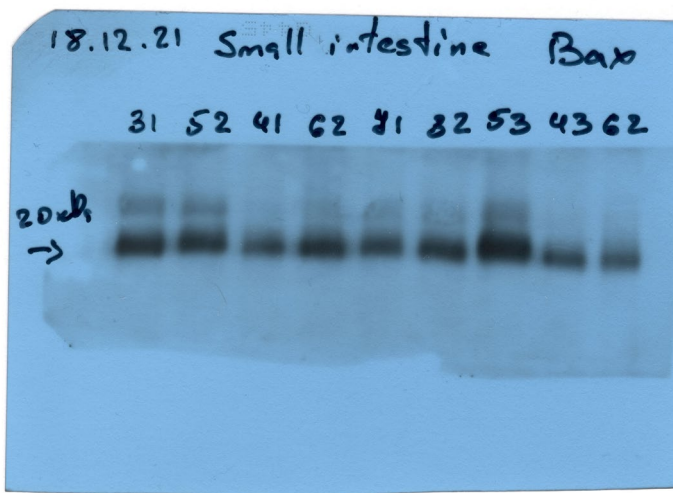

1 gel

5 min exposition

1 2 3 4 5 6 7 8 9 10

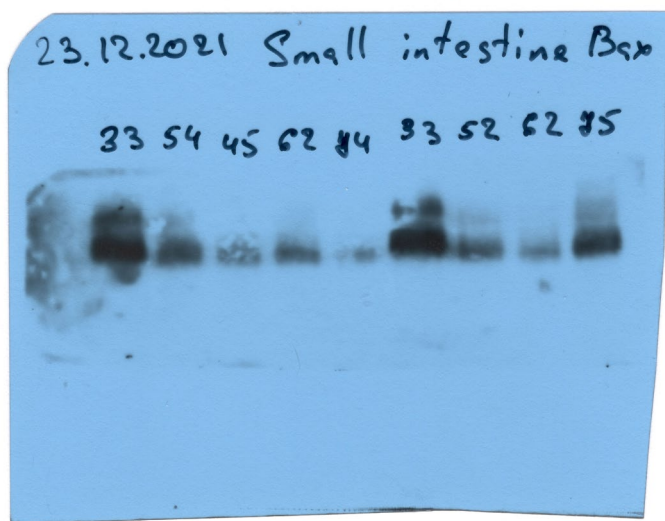

2 gel

5 min exposition

1 2 3 4 5 6 7 8 9 10

23.12.21 Small intestine Bax  
33 54 45 62 74 33 52 62 45

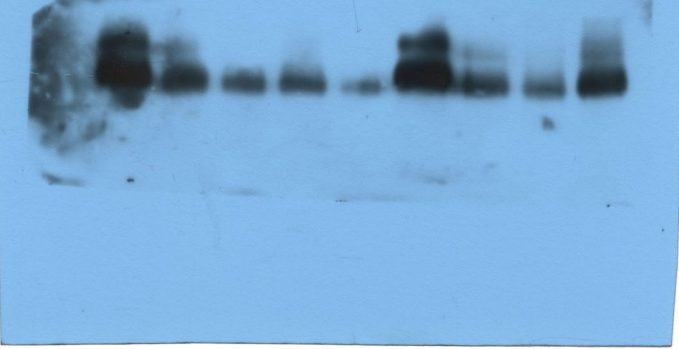

2 gel

1 2 3 4 5 6 7 8 9 10

7 min exposition

**Raw data from Western blot experiments using  $\beta$ -actin antibodies  
(Fig. 3 in the manuscript)**

Immunoblotting was conducted with primary antibody against  $\beta$ -actin (1:5000, A3854, Sigma-Aldrich, USA), 10 % PAAG, 50  $\mu$ g of protein per track. Samples are labelled (according to the Table 2) above the images.

**Table 2 Sample labelling**

| Gel 1 ( $\beta$ -actin) | Gel 2 ( $\beta$ -actin) |
|-------------------------|-------------------------|
| 1 – marker;             | 1 – marker;             |
| 2 – DM2 + met. (45);    | 2 – Control (31);       |
| 3 – DM2 + prop. (62);   | 3 – DM2 (52);           |
| 4 – Control (33);       | 4 – DM2 + met. (41);    |
| 5 – DM2 (54);           | 5 – DM2 + prop. (62);   |
| 6 – DM2 + comb. (74);   | 6 – DM2 + comb. (71);   |
| 7 – DM2 (52);           | 7 – Control (32);       |
| 8 – DM2 + met. (45);    | 8 – DM2 (53);           |
| 9 – DM2 + prop. (62);   | 9 – DM2 + met. (43);    |
| 10 – DM2 + comb. (75).  | 10 – DM2 + prop. (62).  |

**Notes:**

marker – protein ladder;

Control – the control group;

DM2 – the group with experimentally induced type 2 diabetes mellitus (T2DM);

DM2 + met. – the T2DM group that received anti-hyperglycemic agent metformin;

DM2 + prop. – the T2DM group that received sodium salt of propionic acid (PA);

DM2 + comb. – the T2DM group that received concurrently metformin and PA.

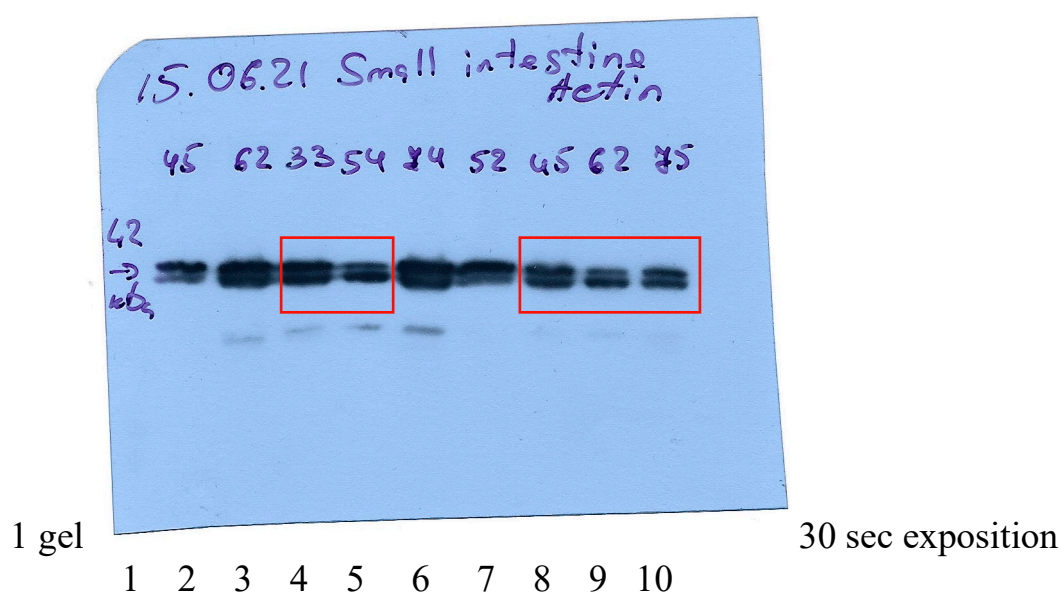

18.06.21 Small intestine  
actin

31 52 41 62 41 32 53 43 62

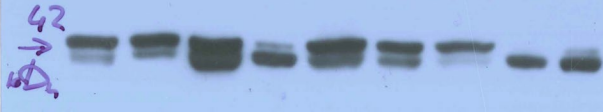

2 gel

1 2 3 4 5 6 7 8 9 10

30 sec exposition

## Raw data from Western blot experiments using Ki67 antibody (Fig. 3 in the manuscript)

Immunoblotting was conducted with primary antibody Ki67 (1:1000, #MA5-14520, Invitrogen, USA), 7.5% PAAG respectively, 50 µg of protein per track. Samples are labelled (according to the Table 3) above the images.

**Table 3 Sample labelling**

| Gel 1 (Ki67)          |
|-----------------------|
| 1 – Control (31);     |
| 2 – DM2 (52);         |
| 3 – DM2 + prop. (62); |
| 4 – DM2 + prop. (66); |
| 5 – DM2 + comb. (71); |
| 6 – DM2 + met. (41);  |
| 7 – DM2 + met. (43);  |
| 8 – DM2 + met. (45);  |
| 9 – DM2 + comb. (75). |
| 10 – marker (M);      |

### Notes:

marker – protein ladder;

Control – the control group;

DM2 – the group with experimentally induced type 2 diabetes mellitus (T2DM);

DM2 + met. – the T2DM group that received anti-hyperglycemic agent metformin;

DM2 + prop. – the T2DM group that received sodium salt of propionic acid (PA);

DM2 + comb. – the T2DM group that received concurrently metformin and PA.

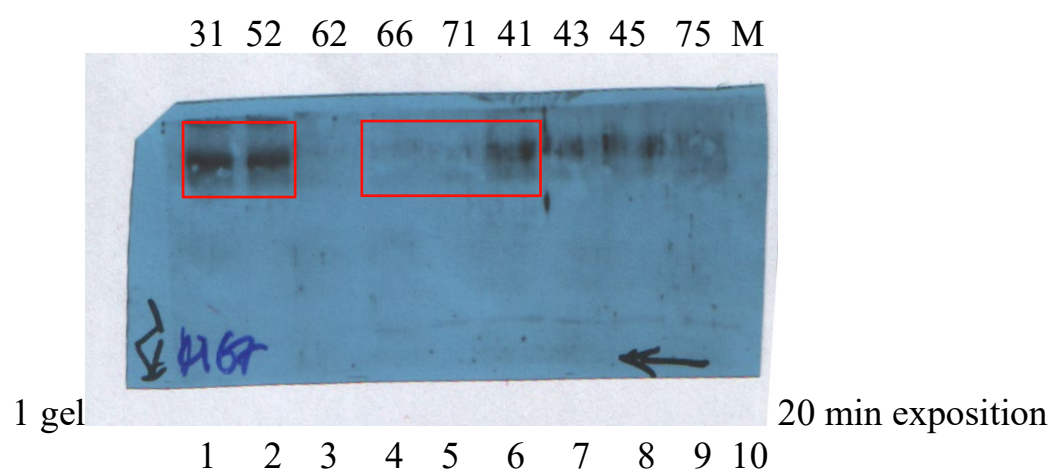

## Raw data from Western blot experiments using caspase-3 antibody (Fig. 3 in the manuscript)

Immunoblotting was conducted with primary antibody against caspase-3 p17 (1:250, sc-373730, Santa Cruz, USA), 15 % PAAG, 50 µg of protein per track. Samples are labelled (according to the Table 4) above the images.

**Table 4 Sample labelling**

| Gel 1 (Ki67)           |
|------------------------|
| 1 – marker;            |
| 2 – Control (31);      |
| 3 – DM2 (52);          |
| 4 – DM2 + met. (43);   |
| 5 – DM2 + met. (41);   |
| 6 – DM2 + comb. (74);  |
| 7 – Control (32);      |
| 8 – DM2 (53);          |
| 9 – DM2 + prop. (62);  |
| 10 – DM2 + prop. (66). |

### Notes:

marker – protein ladder;

Control – the control group;

DM2 – the group with experimentally induced type 2 diabetes mellitus (T2DM);

DM2 + met. – the T2DM group that received anti-hyperglycemic agent metformin;

DM2 + prop. – the T2DM group that received sodium salt of propionic acid (PA);

DM2 + comb. – the T2DM group that received concurrently metformin and PA.

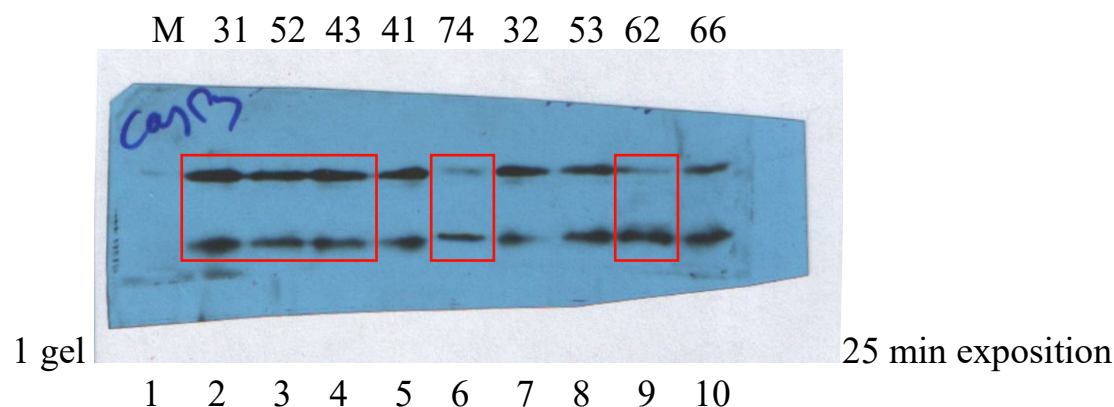

Supplement: Data_Sheet_1.PDF [file Data_Sheet_1.PDF]
